# Supplementary material for: Myopathy associated BAG3 mutations lead to protein aggregation by stalling Hsp70 networks
Source: PubMed Central journal article supplement (PMC6297355; doi:10.1038/s41467-018-07718-5), 2018-12-17
Supplement: 41467_2018_7718_MOESM1_ESM.pdf [file 41467_2018_7718_MOESM1_ESM.pdf]

# **Myopathy associated BAG3 mutations lead to protein aggregation by stalling Hsp70 networks**

M.Meister-Broekema, R. Freilich, C. Jagadeesan, J.N. Rauch et al.

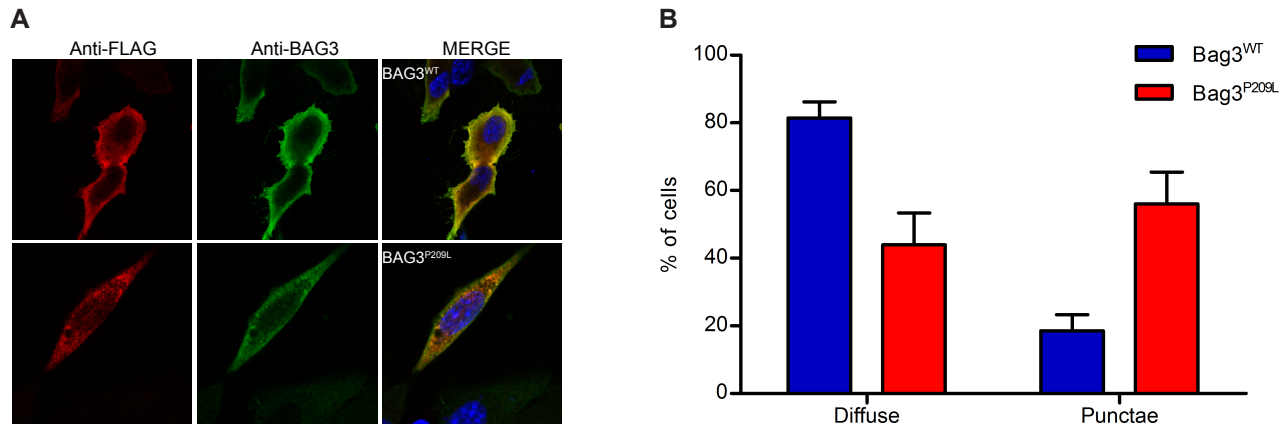

Supplementary Figure 1: **a** Immunofluorescence pictures of myoblast expressing FLAG-BAG3WT or FLAG-BAG3P209L, using BAG3 (green) or FLAG (red) antibodies. DAPI staining is shown in blue. **b** Quantification of punctae and diffuse staining of BAG3 in myoblast expressing BAG3WT or BAG3P209L. Error bars represent the SD. The number of cells with punctae is significantly increased in cells expressing BAG3P209L with a p-value of  $>0.05$  (using Posthoc test: Bonferroni-Holm). Source data are provided as a Source data file.

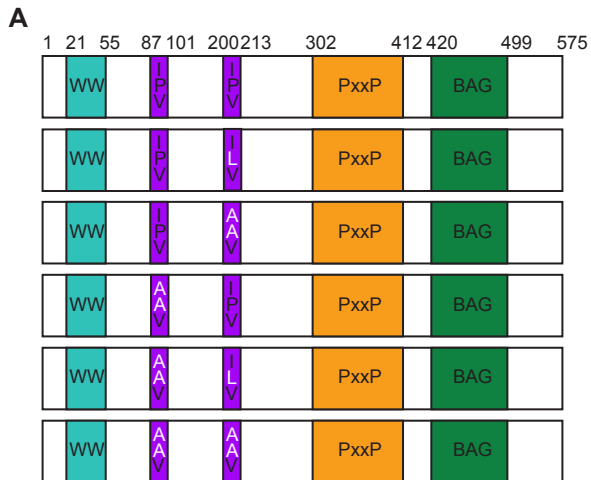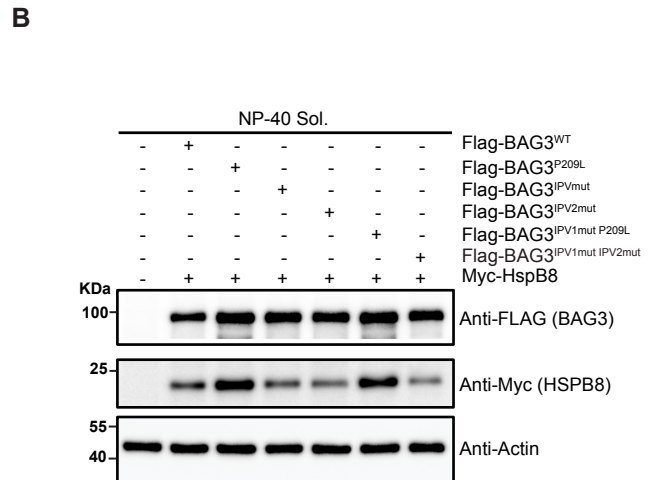

Supplementary Figure 2: **a** Schematic representation of BAG3 mutants used. **b** NP-40 soluble fractions belonging to Figure 2C of cells expressing indicated FLAG-BAG3 variants. Western blot against the indicated antibodies is shown. Source data are provided as a Source data file.

**A**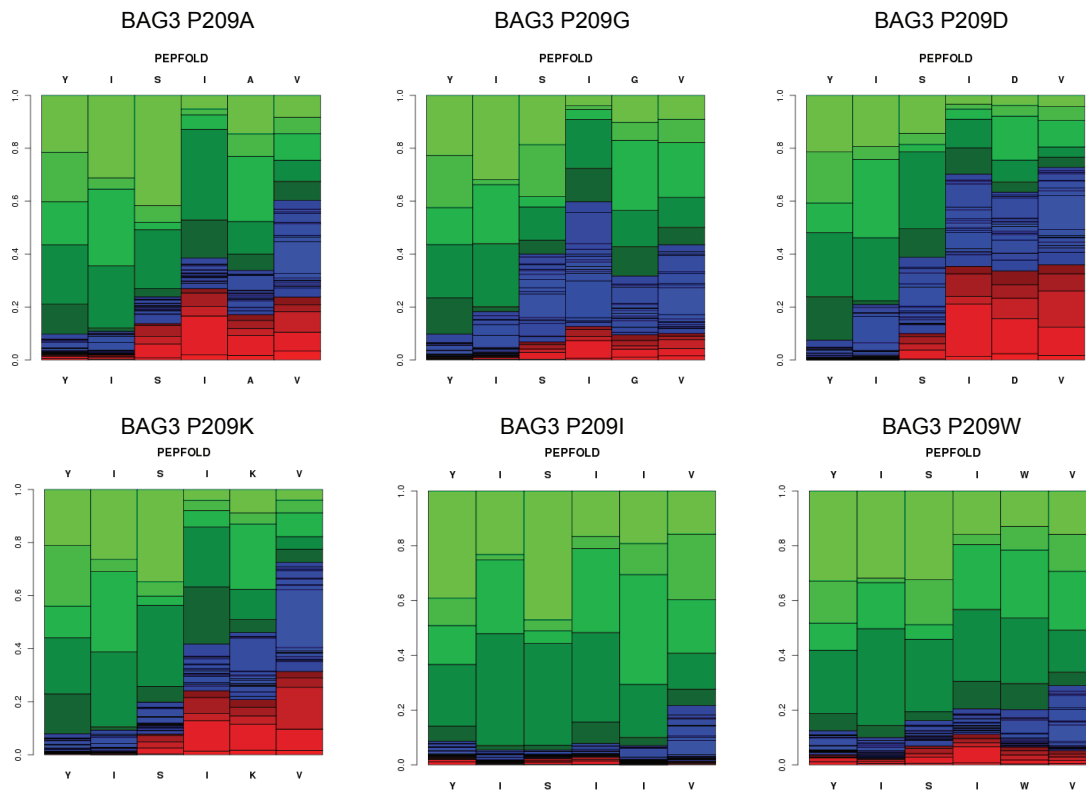**B**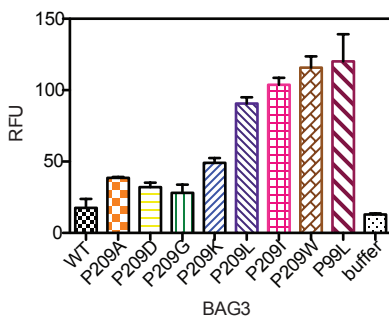**C**

| mutant       | Hsp27c<br>affinity<br>(fold change) | N   |
|--------------|-------------------------------------|-----|
| controls     |                                     |     |
| P209A        | 2.0                                 | 1.9 |
| P209D        | 1.9                                 | 1.9 |
| P209G        | 1.9                                 | 1.8 |
| P209K        | 2.6                                 | 2.0 |
| hydrophobics |                                     |     |
| P209I        | 3.6                                 | 0.9 |
| P209L        | 3.7                                 | 1.1 |
| P209W        | 2.8                                 | 1.3 |

**D**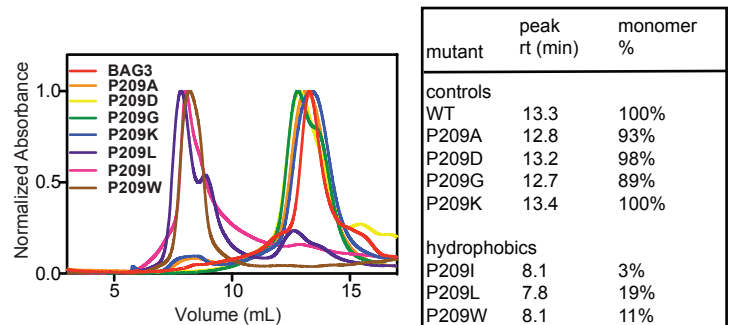

Supplementary Figure 3: **a** PepFold predictions for additional hydrophobic and control mutants at position 209. **b** Hydrophobic BAG3 mutants, but not controls, bind to ThT in vitro. Results are the average of at least three independent experiments performed in triplicate each. Error bars represent SD. Relative ThT fluorescence is shown. **c** Normalized (to BAG3WT) affinity and stoichiometric ratio (N) for Hsp27c/HSPB1c of indicated BAG3 mutants. **d** BAG3P209L and hydrophobic BAG3 mutants, but not controls, are soluble oligomer, as observed by SEC-MALS. Protein solutions (230  $\mu$ M) were separated by SEC and the size of particles estimated by light scattering. Retention times and percent monomer are shown. Results are representative of measurements performed in triplicate. Source data are provided as a Source data file.

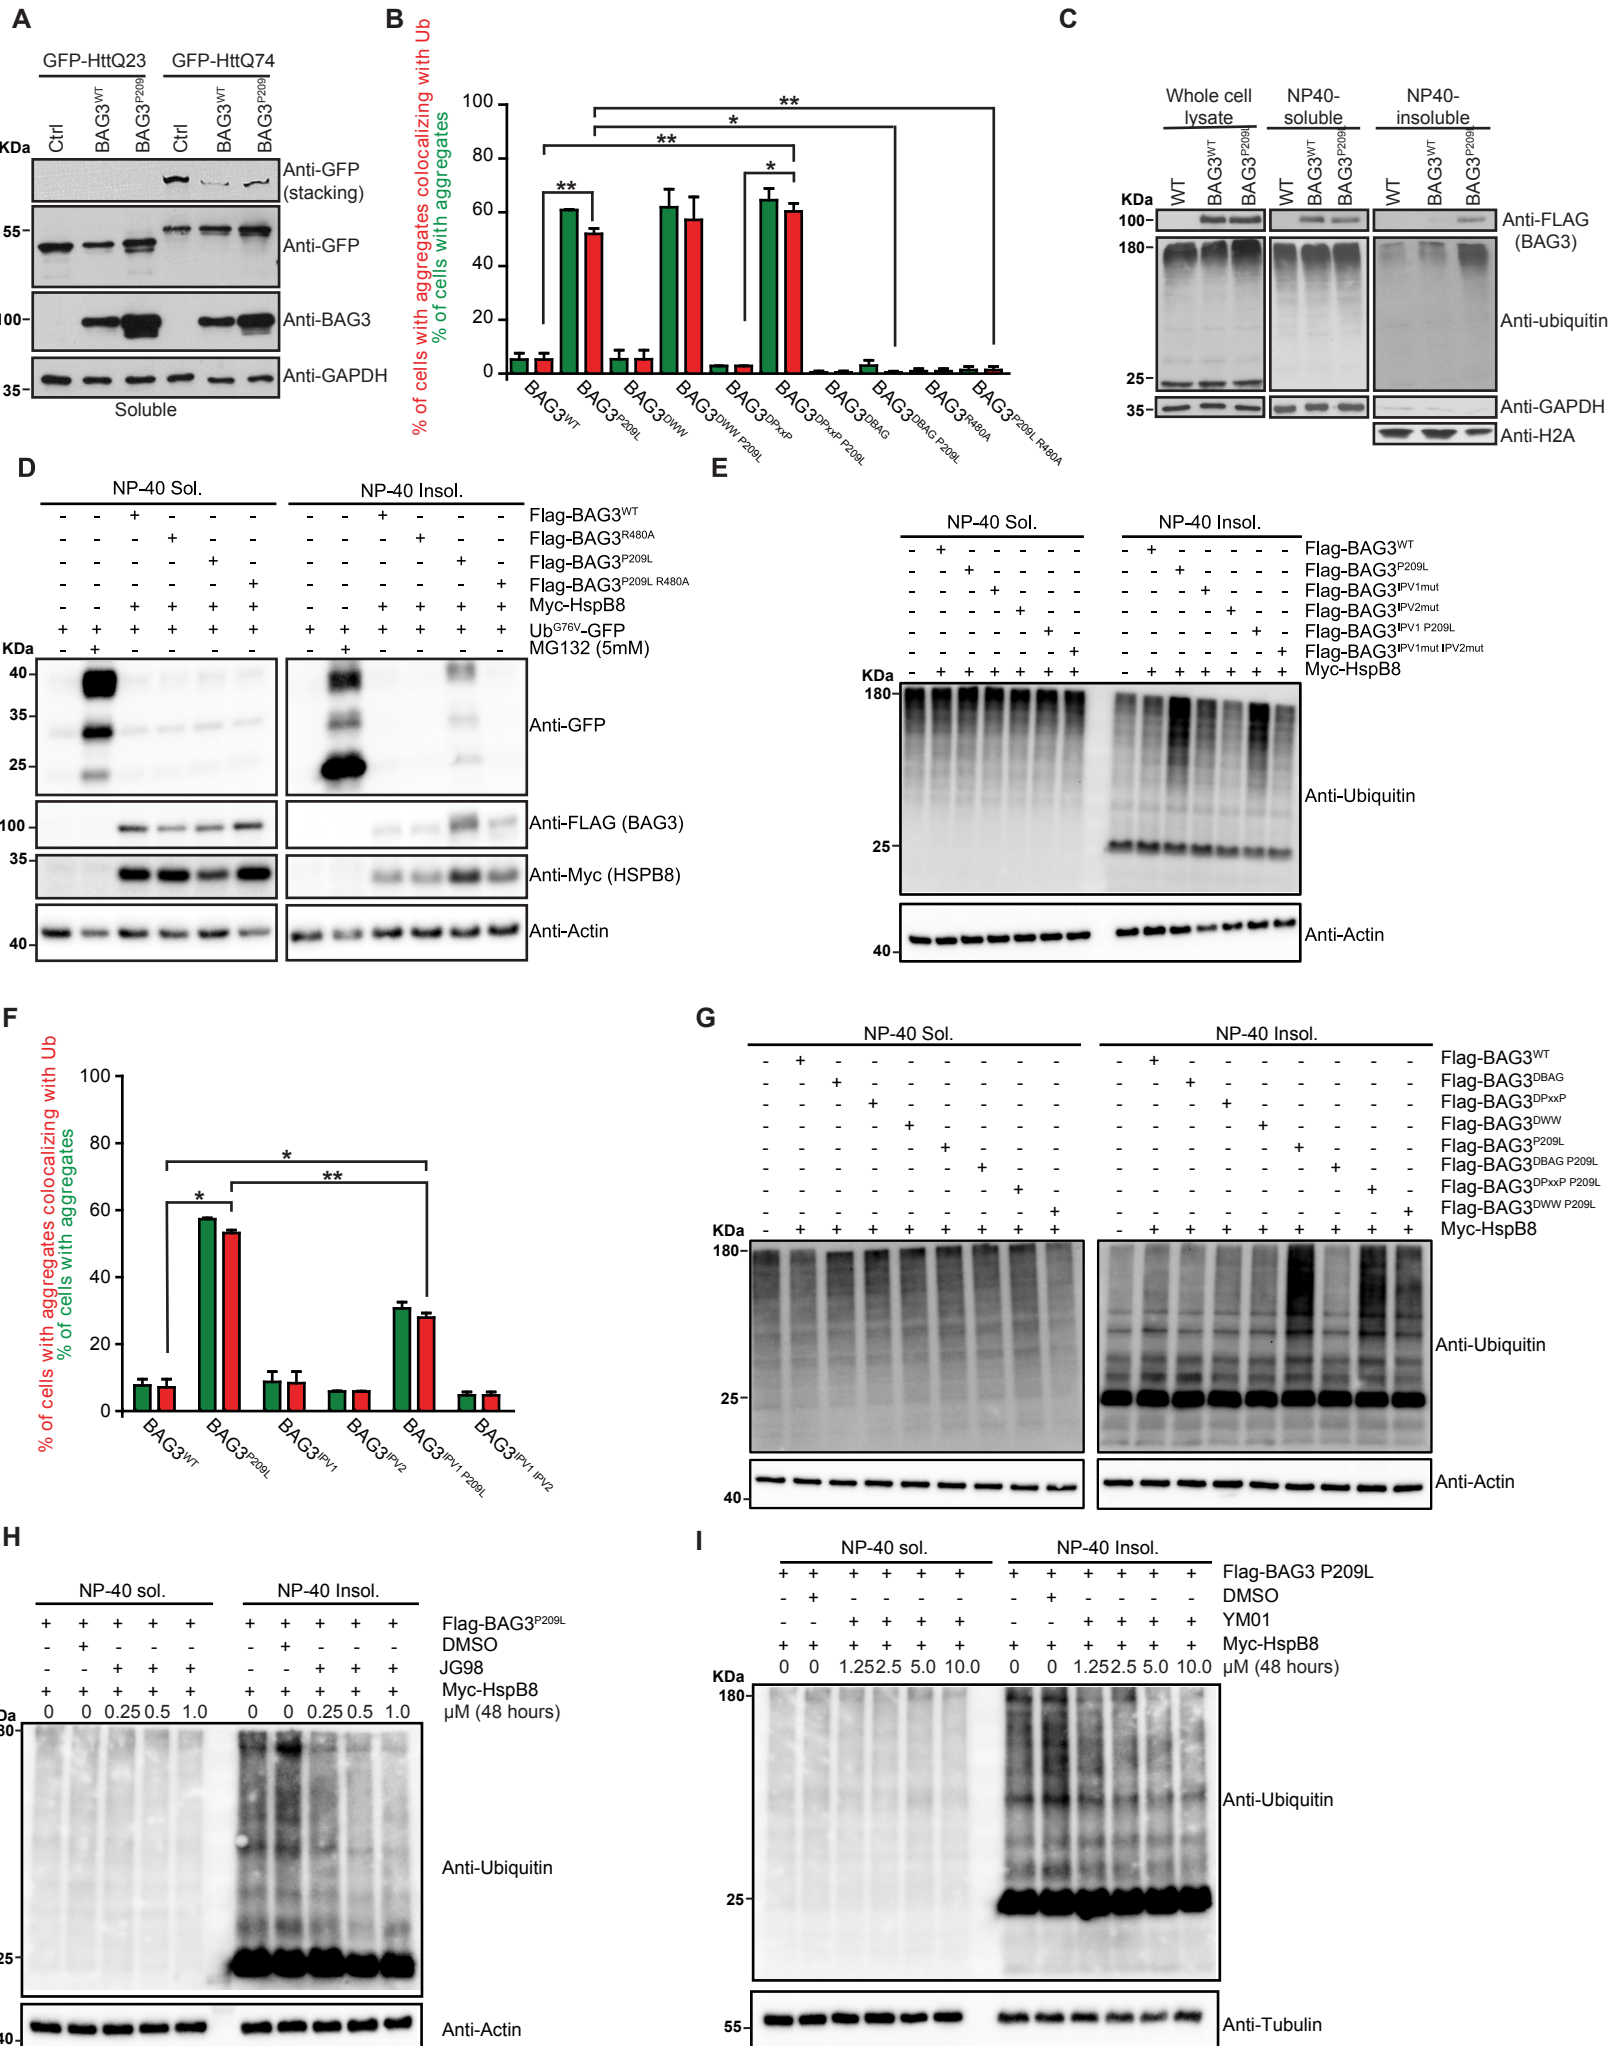

Supplementary Figure 4: **a** Effect of FLAG-BAG3WT or FLAG-BAG3P209L on expression levels of GFP-HttQ23 and GFP-HttQ74 (exon-1 of the huntingtin gene) and on GFP-HttQ74 aggregation (stacking). Western blot against indicated antibodies is shown (belongs to Figure 6D,E). **b** Quantification of the percentage of HeLa cells with BAG3 aggregates (green) and percentage of cells with BAG3 aggregates that co-localize with ubiquitin (red). Cells expressed HSPB8 and BAG3 or the indicated variants of BAG3. Data represents the mean and standard deviation of two independent experiments at least 100 cells were counted per experiment (Welch t-test was used to calculate the P values,\* indicates  $P < 0.05$  and \*\* indicates  $P < 0.01$ ). **c** Fractionation of HEK293 cells expressing a control, FLAG-BAG3WT or FLAG-BAG3P209L. Western blot against FLAG (BAG3), ubiquitin, GAPDH and H2A are shown. **d** Fractionation of stably expressing UbG76V-GFP HEK293 cells expressing HSPB8, a control or BAG3WT or BAG3P209L. Western blot against GFP, FLAG (BAG3), Myc (HSPB8) and tubulin is shown. **e** Fractionation of HEK293 cells expressing a control, FLAG-BAG3WT or various FLAG-BAG3 –IPV mutants as indicated. Western blot against FLAG (BAG3), ubiquitin and actin are shown. **f** Quantification of the percentage of HeLa cells with BAG3 aggregates (green) and percentage of cells with BAG3 aggregates that co-localize with ubiquitin (red). Cells expressed HSPB8 and BAG3 or the indicated variants of BAG3. Data represents the mean and standard deviation of two independent experiments at least 100 cells were counted per experiment (Welch t-test was used to calculate the P values,\* indicates  $P < 0.05$  and \*\* indicates  $P < 0.01$ ). **g** Fractionation of HEK293 cells expressing HSPB8, a control or BAG3WT or BAG3P209L or the indicated single or double deletion mutants. Western blot against indicated antibodies is shown. The same samples as in Figure 5C have been used, loading control is therefore the same. **h** Fractionation of HEK293 cells expressing HSPB8 and BAG3P209L in the presence of increasing concentration of JG98. Western blot against indicated antibodies is shown. The same samples as in Figure 5G have been used, loading control is therefore the same. **i** Fractionation of HEK293 cells expressing HSPB8 and BAG3P209L in the presence of increasing concentration of YM01. Western blot against indicated antibodies is shown. The same samples as in figure 5H have been used, loading control is therefore the same. Source data are provided as a Source data file.

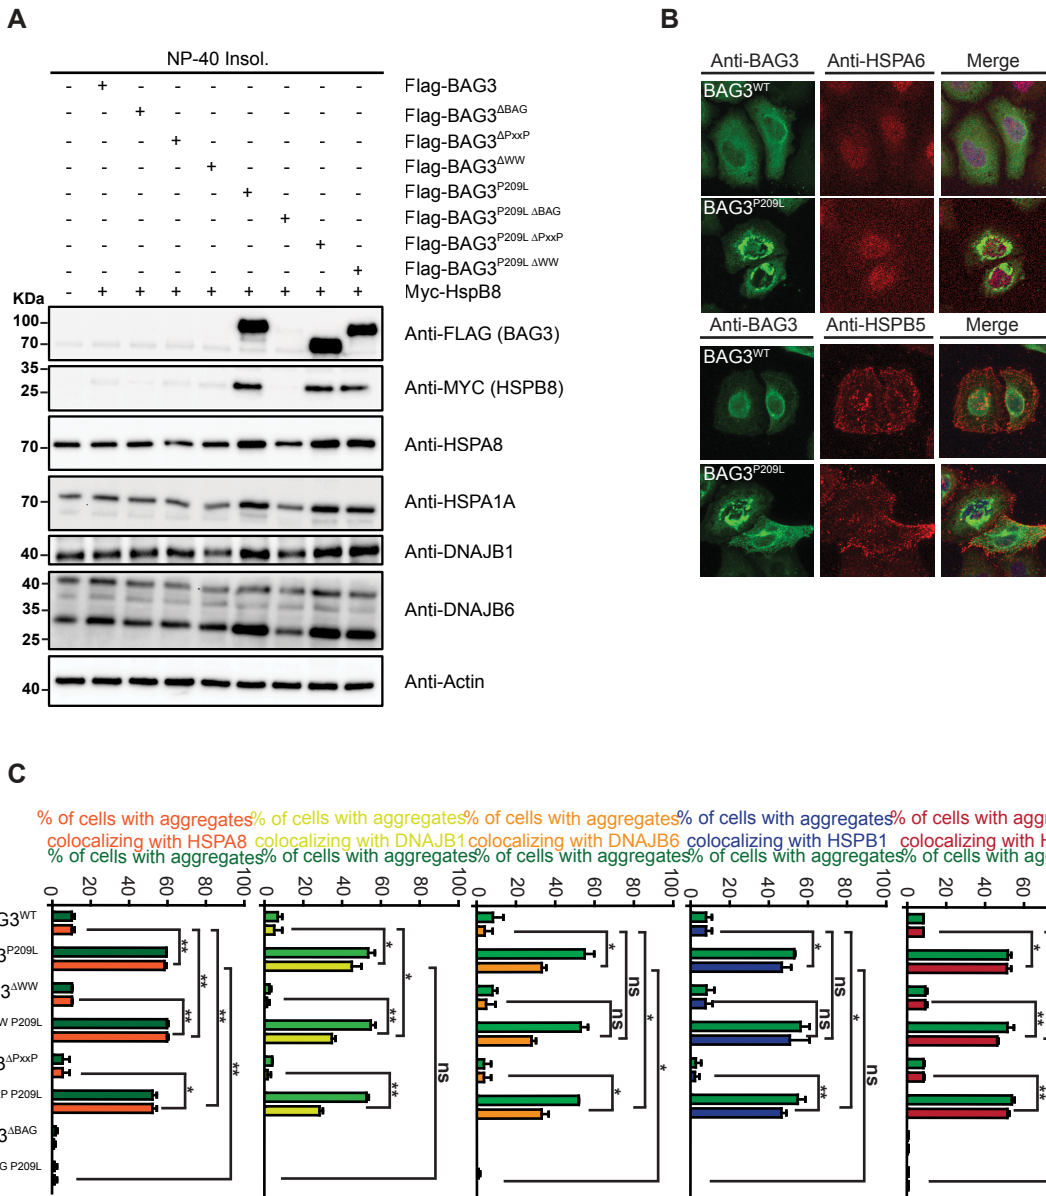

Supplementary Figure 5: **a** Fractionation of HEK293 cells expressing Myc-HSPB8 and BAG3 variants. Western blots using the indicated HSP antibodies are shown (additional data to Figure 7A). The same samples as in Figure 5C have been used, loading controls are therefore the same. **b** Immunofluorescence pictures of HeLa cells expressing FLAG-BAG3<sup>WT</sup> or FLAG-BAG3<sup>P209L</sup>. Cells were stained with the indicated antibodies for staining endogenous chaperones. **c** Quantification of the percentage of cells with aggregates and cells with aggregates that colocalize with the indicated chaperones. Data represents the mean and standard deviation of two independent experiments (at least 100 cells were counted per experiment, Welch t-test was used to calculate the P values, \* indicates  $P < 0.05$  and \*\* indicates  $P < 0.01$  and ns is not significant). Source data are provided as a Source data file.

**A**

|                          | Patient 1                                                                                                      | Patient 2                                                                                                                                        |
|--------------------------|----------------------------------------------------------------------------------------------------------------|--------------------------------------------------------------------------------------------------------------------------------------------------|
| <b>BAG3</b>              | c.1408C>T<br>p.Pro407Ser                                                                                       | c.1408C>T<br>p.Pro407Ser                                                                                                                         |
| <b>Sex</b>               | Male                                                                                                           | Female                                                                                                                                           |
| <b>Age</b>               | 45                                                                                                             | 37                                                                                                                                               |
| <b>Onset</b>             | 35                                                                                                             | 28                                                                                                                                               |
| <b>Weakness</b>          | Symmetric                                                                                                      | Mild asymmetry                                                                                                                                   |
| <b>Deltoid</b>           | 4+                                                                                                             | 5                                                                                                                                                |
| <b>Biceps</b>            | 5                                                                                                              | 5                                                                                                                                                |
| <b>Triceps</b>           | 5                                                                                                              | 5                                                                                                                                                |
| <b>Wrist extensors</b>   | 5                                                                                                              | 5                                                                                                                                                |
| <b>Hand intrinsics</b>   | 5                                                                                                              | 5                                                                                                                                                |
| <b>Iliopsoas</b>         | 4                                                                                                              | 5                                                                                                                                                |
| <b>Quadriceps</b>        | 5                                                                                                              | 5                                                                                                                                                |
| <b>Hamstrings</b>        | 5                                                                                                              | 5                                                                                                                                                |
| <b>Gastrocnemius</b>     | 5                                                                                                              | 4-                                                                                                                                               |
| <b>Tibialis anterior</b> | 4                                                                                                              | 2-3                                                                                                                                              |
| <b>Sensation</b>         | NL                                                                                                             | NL                                                                                                                                               |
| <b>Reflexes</b>          | Trace throughout                                                                                               | Absent at the ankles                                                                                                                             |
| <b>Creatine kinase</b>   | 618 (nl 30-200)                                                                                                | 306 (nl 30-200)                                                                                                                                  |
| <b>EMG</b>               | Myopathic changes in proximal muscles and neurogenic features in distal leg muscles.                           | Acute and chronic denervation in the peroneal and tibial nerve innervated muscles and moderate to chronic denervation in the vastus.             |
| <b>Biopsy</b>            | Quadriceps and Deltoid with small angular fibers, rimmed vacuoles and TDP-43 inclusions<br><b>RV myopathy.</b> | Fiber atrophy with centrally located eosinophilic and trichome positive inclusions, RVs and Z-disc streaming on EM. <b>Myofibrillar myopathy</b> |

**B**

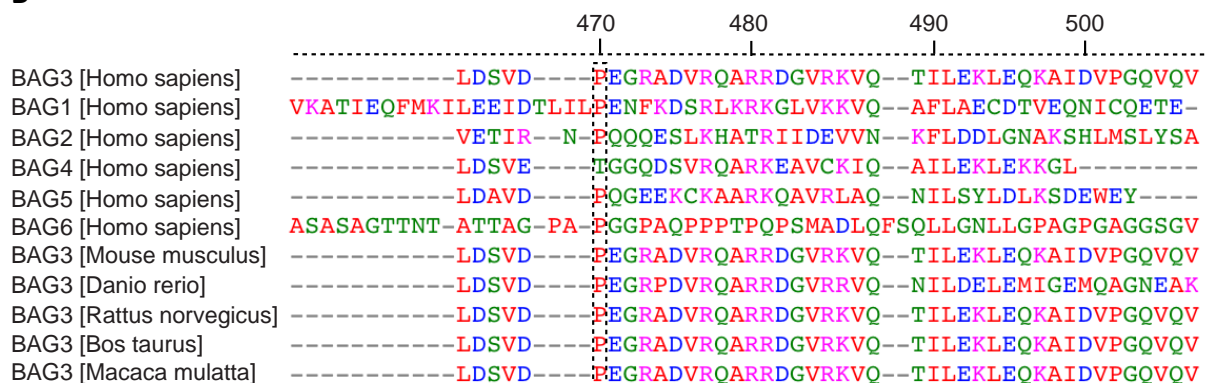

**Supplementary Figure 6: a** Patient characteristics. **b** Alignment of BAG3 proteins show the high conservation of proline at position 470.



A

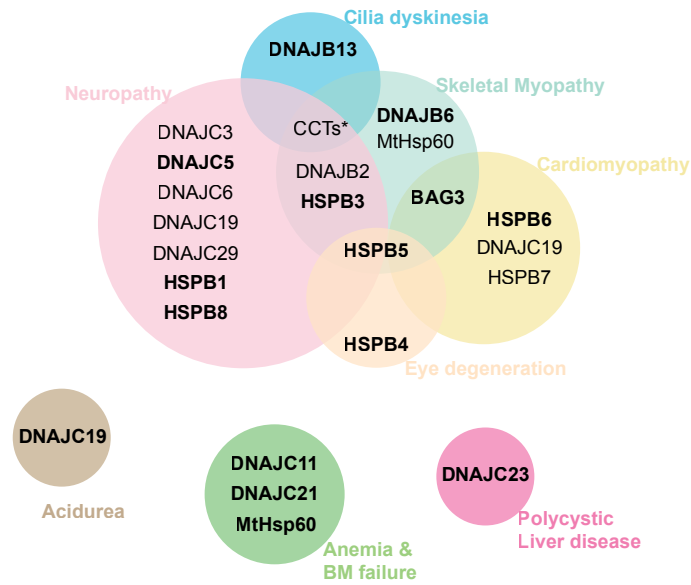

B

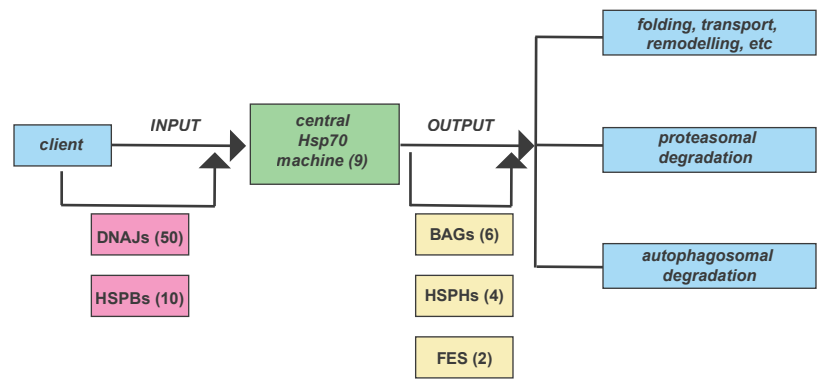

Supplementary Figure 7: Chaperonopathies. **a** Overview of chaperones for which mutations have been demonstrated to cause human dominant (bold) or recessive (non-bold) diseases. Note the over-representation of diseases in tissues with low turnover rates. It is important to also note that many but not all chaperonopathies, especially the recessive forms, are associated with protein aggregation. **b** Basic Hsp70 machines existing of the central Hsp70 proteins (9 isoforms in humans) and regulation of client input by the 50 different human DNAJs and 10 HSPBs; Client output (fate) is in part regulated by the different nucleotide exchange factors (NEFs), including HSPHs (4 in humans), BAG6 (6 in humans) and FES-like proteins (2 in humans). Note, the fate of the client is likely also largely determined by its folding state and that certain DNAJs/HSPBs may already co-determine fate, e.g. via interactions with specific NEFs (not indicated).

**Supp. Table I.****Primers used for cloning *E.coli* strains in this study**

| Primer            | Sequence                            |
|-------------------|-------------------------------------|
| Bag3 EcoRI F      | TACTACGAATTCTATGAGCGCCGCCACCCACTCGC |
| bag3_reverse_XhoI | GTAGTACTCGAGCTACGGTGCTGCTGGGTACCAGG |
| BAG3P209L For     | GGTACATCTCCATTCTGGTGATACACGAGC      |
| BAG3P209L Rev     | GCTCGTGTATCACCAGAATGGAGATGTACC      |
| Bag3 dWW For      | CCCAAGGAGACTCCATCCTCTGCCAATG        |
| Bag3 dWW Rev      | CAAAGGGTCGCGGTCACCGTTGCCG           |
| dBag VtoA For     | CATGATGCAGGTGGCGTCCGGCAACGGTG       |
| dBag VtoA Rev     | CACCGTTGCCGGACGCCACCTGCATCATG       |
| Bag3 dIPV1 for    | CCAGGCTACATTGCCGCTGCTGTGCTCCATGAAG  |
| Bag3 dIPV1 rev    | CTTCATGGAGCACAGCAGCGGCAATGTAGCCTGG  |
| Bag3 dIPV2 for    | GTACATCTCCGCTGCGGTGATACACGAGC       |
| Bag3 dIPV2 rev    | GCTCGTGTATCACCAGCAGCGGAGATGTAC      |
| CMV For           | CGCAAATGGGCGGTAGGCGT                |
| Rev CMV           | ACAGTGGGAGTGGCACCTTC                |
| Bag3 nt623        | CGGTGATACACGAGCAGAAC                |
| T7 promoter For   | TAATACGACTCACTATAGG                 |

Primers used for cloning BAG3 and its mutants.

BAG3 cloning primers (into pMCSG7 using LIC cloning) 5' -> 3':

Fwd: TACTTCCAATCCAATGCAatgagcgcgcccaccactcgcccatgat

Rev: TTATCCACTTCCAATGTTActacggtgctgctgggtaccaggggtgtctgtc

Mutagenesis primers:

### **P209L**

Fwd: gggtacatctccattctggtgatacacgagcagaa

Rev: ccgggtaacgttctgctcgtgtatcacgagaatggag

### **P209I**

Fwd: gggtacatctccattatcgtgatacacgagcagaa

Rev: ccgggtaacgttctgctcgtgtatcacgataatggag

### **P209A**

Fwd: gggtacatctccattgggtgatacacgagcagaa

Rev: ccgggtaacgttctgctcgtgtatcaccgcaatggag

### **P209G**

Fwd: gggtacatctccattgggtgatacacgagcagaa

Rev: ccgggtaacgttctgctcgtgtatcaccccaatggag

### **P209W**

Fwd: gggtacatctccattgggtgatacacgagcagaa

Rev: ccgggtaacgttctgctcgtgtatcacccaatggag

### **P209D**

Fwd: gggtagatctccattgacgtgatacacgagcagaa

Rev: ccgggtaacgttctgctcgtgtatcacctcaatggag

### **P209K**

Fwd: gggtagatctccattaaggtagatacacgagcagaa

Rev: ccgggtaacgttctgctcgtgtatcacctcaatggag

### **P99L**

Fwd: caggctacattcccattctgtgctccatgaag

Rev: gcgccttcatggagcacaagaatgggaatgtag

### **IPV1mut:**

Fwd: gctacattcccggctcctgggctccatgaaggcgt

Rev: ctctatggagcccaggaccgggaatgtagcctggt

### **IPV2mut:**

Fwd: gtacatctccggctccgggatacacgagcagaa

Rev: gtatccccggaccggagatgtacccccgcg

**Supplementary Table S2. Plasmids used in this study**

| Plasmid                                 | Description                                                                                                           | Reference                       |
|-----------------------------------------|-----------------------------------------------------------------------------------------------------------------------|---------------------------------|
| pMCSG7 BAG3                             | pMCSG7 containing His tagged, TEV protease cleavable BAG3, Amp <sup>R</sup>                                           | Rauch et al. 2014 <sup>24</sup> |
| pMCSG7 BAG3 mutants                     | pMCSG7 containing His tagged, TEV protease cleavable BAG3 P209L/A/G/D/K/I/W or IPV1/IPV2/IPV12, Amp <sup>R</sup>      | This study                      |
| pMCSG7 Hsp27c                           | pMCSG7 containing His tagged, TEV protease cleavable BAG3, Amp <sup>R</sup>                                           | Rauch et al. 2014 <sup>21</sup> |
| pMCSG7 Hsc70/HSPA8                      | pMCSG7 containing full length Hsc70 or Hsc70 <sup>NBD</sup> , His tagged and TEV protease cleavable, Amp <sup>R</sup> | Rauch et al. 2014 <sup>21</sup> |
| pcDNA3 FLAG-Parkin                      | pcDNA3 containing FLAG tagged human Parkin, Amp <sup>R</sup>                                                          | Christian Behl                  |
| pCIN His-BAG3                           | pCINeo containing His tagged human BAG3, Amp <sup>R</sup>                                                             | Serena Carra                    |
| pCIN His-BAG3 <sup>ΔBAG</sup>           | pCINeo containing His tagged human BAG3 with BAG domain deletion, Amp <sup>R</sup>                                    | Serena Carra                    |
| pCIN His-BAG3 <sup>ΔPxxP</sup>          | pCINeo containing His tagged human BAG3 with PxxP domain deletion, Amp <sup>R</sup>                                   | Serena Carra                    |
| pCIN Myc-HspB8                          | pCINeo containing Myc tagged human HspB8, Amp <sup>R</sup>                                                            | Serena Carra                    |
| pcDNA3 FLAG-BAG3                        | pcDNA3 containing FLAG tagged human BAG3, Amp <sup>R</sup>                                                            | This study                      |
| pcDNA3 FLAG-BAG3 <sup>P209L</sup>       | pcDNA3 containing FLAG tagged human BAG3 with P209L point mutation, Amp <sup>R</sup>                                  | This study                      |
| pcDNA3 FLAG-BAG3 <sup>ΔBAG</sup>        | pcDNA3 containin FLAG tagged human BAG3 with BAG domain deletion, Amp <sup>R</sup>                                    | This study                      |
| pcDNA3 FLAG-BAG3 <sup>ΔBAG P209L</sup>  | pcDNA3 containing FLAG tagged human BAG3 with BAG domain deletion and P209L point mutation, Amp <sup>R</sup>          | This study                      |
| pcDNA3 FLAG-BAG3 <sup>ΔPxxP</sup>       | pcDNA3 containing FLAG tagged human BAG3 with PxxP domain deletion, Amp <sup>R</sup>                                  | This study                      |
| pcDNA3 FLAG-BAG3 <sup>ΔPxxP P209L</sup> | pcDNA3 containing FLAG tagged human BAG3 with PxxP domain deletion and P209L point mutation, Amp <sup>R</sup>         | This study                      |
| pcDNA3 FLAG-BAG3 <sup>ΔWW</sup>         | pcDNA3 containing FLAG tagged human BAG3 with WW domain deletion, Amp <sup>R</sup>                                    | This study                      |
| pcDNA3 FLAG-BAG3 <sup>ΔWW P209L</sup>   | pcDNA3 containing FLAG tagged human BAG3 with WW domain deletion and P209L point mutation, Amp <sup>R</sup>           | This study                      |
| pcDNA3 FLAG-BAG3 <sup>R480A</sup>       | pcDNA3 containing FLAG tagged human BAG3 with R480A point mutation, Amp <sup>R</sup>                                  | This study                      |
| pcDNA3 FLAG-BAG3 <sup>P209L R480A</sup> | pcDNA3 containing FLAG tagged human BAG3 with P209L and R480A point mutations, Amp <sup>R</sup>                       | This study                      |
| pcDNA3 FLAG-BAG3 <sup>IPV1mut</sup>     | pcDNA3 containing FLAG tagged human BAG3 with IPV1 substituted to AAA, Amp <sup>R</sup>                               | This study                      |
| pcDNA3 FLAG-BAG3 <sup>IPV2mut</sup>     | pcDNA3 containing FLAG tagged human BAG3 with IPV2 substituted to AA, Amp <sup>R</sup>                                | This study                      |

|                                              |                                                                                                                    |            |
|----------------------------------------------|--------------------------------------------------------------------------------------------------------------------|------------|
| pcDNA3 FLAG-BAG3 <sup>IPV1mut-P209L</sup>    | pcDNA3 containing FLAG tagged human BAG3 with IPV1 substituted to AAA and P209L point mutation, Amp <sup>R</sup>   | This study |
| pcDNA3 FLAG-BAG3 <sup>IPV1mut-IPV2 mut</sup> | pcDNA3 containing FLAG tagged human BAG3 with IPV1 substituted to AAA and IPV2 substituted to AA, Amp <sup>R</sup> | This study |

## Supplementary methods

### Additional information recombinant protein production

Briefly, HSPBs and Hsp70s were expressed in BL21(DE3) cells and single colonies were used to inoculate TB medium containing ampicillin (50 µg/mL). Cultures were grown at 37 °C for 5 hours, cooled to 20 °C and induced overnight with 200 µM IPTG. Hsp72 variants were purified using a His column, followed by cleavage of the tag via TEV protease, and final purification on an ATP-agarose column. Briefly, proteins were first purified by batch purification with Ni-NTA His•Bind® Resin (Novagen, Darmstadt, Germany) following the user manual. The His-tag of eluted protein was then removed by His-tagged TEV protease (1 mM DTT, 4 °C, overnight incubation). After adjusting the MgCl<sub>2</sub> and KCl concentration to 10 mM, the sample was further purified by ATP-agarose column. Finally, the remaining cleaved His-tag was removed by Ni-NTA column. Hsp27c is tagless, so it was purified using a two-step ammonium sulfate precipitation followed by MonoQ and SEC. Briefly, ammonium sulfate was added to a final concentration of 16.9% (w/v), centrifuged, pellet discarded, and then an additional 16.9% (w/v) ammonium sulfate was added to the supernatant to precipitate the protein from solution. Precipitated protein was brought up and dialyzed into MonoQ Buffer A (20 mM Tris, pH 8.0) overnight, followed by a MonoQ column (0-1 M NaCl gradient), and finally an SEC on a Superdex S75 (Hsp27c) or Superdex S200 (GE Healthcare) equilibrated in 50 mM sodium phosphate, 100 mM NaCl, pH 7.5 buffer.
